# Supplementary material for: Breed differences of heritable behaviour traits in cats
Source: PubMed Central journal article supplement (PMC6538663; doi:10.1038/s41598-019-44324-x), 2019-05-28
Supplement: 41598_2019_44324_MOESM2_ESM.pdf [file 41598_2019_44324_MOESM2_ESM.pdf]

## **Breed differences of heritable behaviour traits in cats**

**Milla Salonen, Katariina Vapalahti, Katriina Tiira, Asko Mäki-Tanila, Hannes Lohi**

**Supplementary Table S11.** Phenotypic and genetic correlations in Maine Coon.

|                               | Activity level                       | Contact to people                       | Aggression to strangers              | Aggression to family members         | Aggression to other cats             | Shyness towards novel objects           | Shyness towards strangers               |
|-------------------------------|--------------------------------------|-----------------------------------------|--------------------------------------|--------------------------------------|--------------------------------------|-----------------------------------------|-----------------------------------------|
| Activity level                |                                      | <b>0.29</b><br>( <b>0.18, 0.40</b> )    | 0.11<br>(-0.00, 0.24)                | 0.10<br>(-0.01, 0.22)                | 0.07<br>(-0.06, 0.19)                | <b>-0.17</b><br>( <b>-0.28, -0.05</b> ) | <b>-0.17</b><br>( <b>-0.28, -0.04</b> ) |
| Contact to people             | <b>0.28</b><br>( <b>0.05, 0.51</b> ) |                                         | 0.03<br>(-0.08, 0.16)                | -0.04<br>(-0.17, 0.07)               | -0.01<br>(-0.13, 0.11)               | <b>-0.21</b><br>( <b>-0.31, -0.07</b> ) | <b>-0.29</b><br>( <b>-0.42, -0.18</b> ) |
| Aggression to strangers       | 0.14<br>(-0.06, 0.34)                | 0.04<br>(-0.17, 0.25)                   |                                      | <b>0.32</b><br>( <b>0.21, 0.42</b> ) | <b>0.17</b><br>( <b>0.05, 0.29</b> ) | -0.09<br>(-0.21, 0.05)                  | -0.10<br>(-0.22, 0.03)                  |
| Aggression to family members  | 0.10<br>(-0.11, 0.32)                | -0.06<br>(-0.27, 0.15)                  | <b>0.29</b><br>( <b>0.11, 0.46</b> ) |                                      | <b>0.29</b><br>( <b>0.18, 0.40</b> ) | -0.02<br>(-0.16, 0.10)                  | -0.04<br>(-0.17, 0.08)                  |
| Aggression to other cats      | 0.07<br>(-0.21, 0.31)                | -0.05<br>(-0.29, 0.19)                  | 0.11<br>(-0.09, 0.36)                | <b>0.23</b><br>( <b>0.03, 0.44</b> ) |                                      | -0.02<br>(-0.10, 0.07)                  | 0.04<br>(-0.08, 0.15)                   |
| Shyness towards novel objects | -0.18<br>(-0.43, 0.09)               | -0.28<br>(-0.54, 0.01)                  | -0.10<br>(-0.32, 0.12)               | -0.01<br>(-0.26, 0.23)               | 0.14<br>(-0.13, 0.41)                |                                         | <b>0.64</b><br>( <b>0.56, 0.70</b> )    |
| Shyness towards strangers     | -0.16<br>(-0.43, 0.11)               | <b>-0.35</b><br>( <b>-0.61, -0.09</b> ) | -0.09<br>(-0.31, 0.13)               | -0.01<br>(-0.23, 0.26)               | 0.08<br>(-0.23, 0.34)                | <b>0.61</b><br>( <b>0.43, 0.79</b> )    |                                         |

Phenotypic correlations in the upper diagonal, and genetic correlations in the lower diagonal. HPD intervals in the parentheses.

**Supplementary Table S12.** Phenotypic and genetic correlations in Ragdoll.

|                               | Activity level                     | Contact to people                  | Aggression to strangers            | Aggression to family members       | Aggression to other cats           | Shyness towards novel objects         | Shyness towards strangers             |
|-------------------------------|------------------------------------|------------------------------------|------------------------------------|------------------------------------|------------------------------------|---------------------------------------|---------------------------------------|
| Activity level                |                                    | <b>0.36</b><br><b>(0.25, 0.45)</b> | 0.03<br>(-0.08, 0.15)              | 0.05<br>(-0.07, 0.17)              | -0.01<br>(-0.13, 0.11)             | -0.09<br>(-0.21, 0.03)                | -0.04<br>(-0.15, 0.07)                |
| Contact to people             | <b>0.29</b><br><b>(0.05, 0.57)</b> |                                    | -0.04<br>(-0.17, 0.07)             | -0.04<br>(-0.16, 0.07)             | 0.04<br>(-0.09, 0.15)              | <b>-0.24</b><br><b>(-0.35, -0.13)</b> | <b>-0.31</b><br><b>(-0.42, -0.21)</b> |
| Aggression to strangers       | 0.06<br>(-0.16, 0.25)              | -0.02<br>(-0.25, 0.18)             |                                    | <b>0.32</b><br><b>(0.23, 0.43)</b> | 0.11<br>(-0.01, 0.23)              | 0.04<br>(-0.05, 0.16)                 | 0.07<br>(-0.05, 0.18)                 |
| Aggression to family members  | 0.07<br>(-0.11, 0.26)              | -0.03<br>(-0.23, 0.15)             | <b>0.33</b><br><b>(0.19, 0.48)</b> |                                    | <b>0.14</b><br><b>(0.03, 0.26)</b> | 0.02<br>(-0.09, 0.13)                 | 0.04<br>(-0.07, 0.16)                 |
| Aggression to other cats      | 0.05<br>(-0.26, 0.33)              | 0.09<br>(-0.17, 0.40)              | 0.12<br>(-0.11, 0.32)              | 0.14<br>(-0.04, 0.34)              |                                    | 0.01<br>(-0.04, 0.06)                 | -0.01<br>(-0.14, 0.09)                |
| Shyness towards novel objects | -0.01<br>(-0.33, 0.28)             | -0.17<br>(-0.46, 0.14)             | 0.04<br>(-0.16, 0.28)              | 0.03<br>(-0.16, 0.23)              | 0.14<br>(-0.13, 0.42)              |                                       | <b>0.66</b><br><b>(0.59, 0.73)</b>    |
| Shyness towards strangers     | 0.02<br>(-0.32, 0.33)              | -0.28<br>(-0.58, 0.01)             | 0.08<br>(-0.14, 0.30)              | 0.06<br>(-0.13, 0.28)              | 0.02<br>(-0.28, 0.30)              | <b>0.53</b><br><b>(0.29, 0.76)</b>    |                                       |

Phenotypic correlations in the upper diagonal, and genetic correlations in the lower diagonal. HPD intervals in the parentheses.

**Supplementary Table S13.** Phenotypic and genetic correlations in Turkish Van.

|                               | Activity level         | Contact to people                  | Aggression to strangers            | Aggression to family members          | Aggression to other cats           | Shyness towards novel objects      | Shyness towards strangers             |
|-------------------------------|------------------------|------------------------------------|------------------------------------|---------------------------------------|------------------------------------|------------------------------------|---------------------------------------|
| Activity level                |                        | <b>0.33</b><br><b>(0.16, 0.49)</b> | -0.09<br>(-0.27, 0.09)             | -0.01<br>(-0.20, 0.19)                | 0.03<br>(-0.16, 0.23)              | 0.05<br>(-0.13, 0.23)              | 0.03<br>(-0.17, 0.21)                 |
| Contact to people             | 0.28<br>(-0.06, 0.57)  |                                    | -0.12<br>(-0.29, 0.07)             | <b>-0.21</b><br><b>(-0.39, -0.05)</b> | -0.01<br>(-0.21, 0.17)             | -0.12<br>(-0.30, 0.06)             | <b>-0.20</b><br><b>(-0.39, -0.03)</b> |
| Aggression to strangers       | -0.10<br>(-0.44, 0.22) | -0.11<br>(-0.47, 0.27)             |                                    | <b>0.41</b><br><b>(0.26, 0.57)</b>    | 0.06<br>(-0.12, 0.27)              | 0.06<br>(-0.13, 0.24)              | 0.09<br>(-0.11, 0.27)                 |
| Aggression to family members  | -0.03<br>(-0.37, 0.28) | -0.20<br>(-0.55, 0.10)             | <b>0.38</b><br><b>(0.13, 0.64)</b> |                                       | <b>0.21</b><br><b>(0.04, 0.39)</b> | 0.13<br>(-0.05, 0.34)              | 0.13<br>(-0.05, 0.32)                 |
| Aggression to other cats      | -0.09<br>(-0.46, 0.25) | -0.08<br>(-0.44, 0.33)             | 0.08<br>(-0.26, 0.41)              | 0.18<br>(-0.13, 0.52)                 |                                    | 0.09<br>(-0.04, 0.25)              | -0.04<br>(-0.22, 0.15)                |
| Shyness towards novel objects | 0.02<br>(-0.40, 0.33)  | -0.10<br>(-0.49, 0.27)             | 0.01<br>(-0.35, 0.39)              | 0.06<br>(-0.32, 0.40)                 | 0.06<br>(-0.35, 0.45)              |                                    | <b>0.58</b><br><b>(0.47, 0.70)</b>    |
| Shyness towards strangers     | 0.02<br>(-0.32, 0.39)  | -0.13<br>(-0.49, 0.25)             | 0.02<br>(-0.35, 0.38)              | 0.05<br>(-0.29, 0.42)                 | -0.04<br>(-0.45, 0.34)             | <b>0.47</b><br><b>(0.16, 0.74)</b> |                                       |

Phenotypic correlations in the upper diagonal, and genetic correlations in the lower diagonal. HPD intervals in the parentheses.
